# Supplementary material
Source: publisher figshare collection journal article supplement (https://diabetesjournals.figshare.com/ndownloader/files/22522334)
Supplement: Supplementary file 1 [file 22522334]

**Supplemental Table S1.** Sensitivity and specificity to predict other CVD outcomes

|  |  | **CHD (no angina)** | | | **CHD + Stroke** | | |
| --- | --- | --- | --- | --- | --- | --- | --- |
| **Gender** | **WC (cm)** | **Sensitivity (%)** | **Specificity (%)** | **Sum of Sensitivity and Specificity** | **Sensitivity (%)** | **Specificity (%)** | **Sum of Sensitivity and Specificity** |
| Men | 95 | 74.5 | 39.4 | 113.9 | 74.0 | 39.6 | 113.6 |
|  | 96 | 71.4 | 42.6 | 114.0 | 70.9 | 42.8 | 113.7 |
|  | 97 | 69.4 | 46.1 | 115.5 | 68.6 | 46.3 | 114.9 |
|  | **98** | **67.0** | **49.5** | **116.5** | 66.0 | 49.8 | 115.7 |
|  | 99 | 63.2 | 53.1 | 116.3 | 62.3 | 53.3 | 115.6 |
|  | 100 | 58.3 | 57.0 | 115.3 | 57.7 | 57.2 | 114.9 |
|  | 101 | 55.0 | 61.0 | 116.0 | 54.7 | 61.3 | 116.0 |
|  | **102** | **52.3** | **63.9** | **116.3** | **52.3** | **64.3** | **116.5** |
|  | 103 | 49.0 | 66.6 | 115.6 | 48.4 | 66.9 | 115.3 |
|  | 104 | 43.9 | 69.3 | 113.2 | 44.2 | 69.6 | 113.8 |
| Women | 90 | 85.9 | 29.4 | 115.3 | 84.0 | 29.6 | 113.6 |
|  | 91 | 84.4 | 32.8 | 117.2 | 82.1 | 33.0 | 115.1 |
|  | 92 | 81.4 | 35.8 | 117.2 | 79.0 | 36.0 | 115.0 |
|  | 93 | 78.7 | 38.8 | 117.5 | 76.0 | 39.0 | 115.0 |
|  | 94 | 75.2 | 41.9 | 117.1 | 72.9 | 42.1 | 115.0 |
|  | 95 | 71.7 | 45.0 | 116.7 | 69.7 | 45.2 | 114.8 |
|  | 96 | 70.0 | 48.0 | 118.0 | 68.0 | 48.3 | 116.2 |
|  | **97** | **67.3** | **51.0** | **118.3** | **65.1** | **51.3** | **116.3** |
|  | **98** | **64.5** | **53.8** | **118.3** | **62.9** | **54.1** | **116.9** |
|  | 99 | 60.6 | 56.9 | 117.4 | 58.6 | 57.1 | 115.7 |
|  | 100 | 58.3 | 59.8 | 118.2 | 56.2 | 60.1 | 116.3 |

CHD=Coronary Heart Disease; CVD=Cardiovascular Disease; WC=Waist Circumference
